# Supplementary material for: Retraction: Fell, B., and Salveson, M. (2013). “Parametric Simulation of Nonlinear Shear Key Behavior on the Seismic Response on Bridge Abutments.” J. Bridge Eng ., 10.1061/(ASCE)BE.1943-5592.0000465 (Jan. 5, 2013)
Source: Atypon-hosted journal article supplement (doi:10.1061/(asce)be.1943-5592.0000932), 2016-04-09
Supplement: retracted_manuscript_be.1943-5592.0000465.pdf [file retracted_manuscript_be.1943-5592.0000465.pdf]

1 **PARAMETRIC SIMULATION OF NONLINEAR SHEAR KEY BEHAVIOR ON THE SEISMIC RESPONSE**  
2 **ON BRIDGE ABUTMENTS**

3  
4  
5

By **B.V. Fell<sup>1</sup>** and **M.W. Salveson<sup>2</sup>**

6 **ABSTRACT**

7 The effects of a phenomenological non-linear model for transverse bridge abutment shear keys  
8 on the dynamic response of a typical reinforced concrete bridge are investigated. The dynamic  
9 response of bridge structures modeled with a fully linear model, based on the current California  
10 Department of Transportation (Caltrans) Seismic Design Criteria (SDC), are compared to  
11 analysis results which incorporate a non-linear ductile model for the transverse abutment shear  
12 key. Various bridge geometries are considered to determine which common design parameters  
13 affect the accuracy of the current linear models used in design. In each case, the linear and non-  
14 linear models are subject to a suite of 80 ground acceleration time histories and the maximum  
15 lateral bent deformations are compared. The results suggest that the linear model currently used  
16 in analysis and design of California bridges is, in general, conservative across a wide range of  
17 configurations and fundamental periods of vibration (0.5s – 1.4s). Column displacements from  
18 the nonlinear model are as much as 43% larger than predicted displacements from the linear  
19 model. However, the study highlights a possible deficiency of the current modeling approach for  
20 highly flexible bridges.

21  
22  
23

---

<sup>1</sup> Assistant Professor, Dept of Civil Engineering, California State University, Sacramento, Sacramento, CA  
<sup>2</sup> Assistant Professor, Dept of Civil Engineering, California State University, Sacramento, Sacramento, CA

24 **INTRODUCTION**

25 During an earthquake event, the behavior of reinforced concrete bridge abutments is commonly  
26 governed by the stiffness and strength of transverse shear-keys and longitudinal soil conditions.  
27 While the effect of bent strength and ductility capacity has long been the focus of the research  
28 community (Aschheim et al., 1997, Lehman and Moehle, 1998, 2004), a somewhat recent thrust  
29 has been on bridge end conditions, including the effects of the abutment and soil behavior  
30 (Romstad et al., 1995, Goel and Chopra, 1997, Shamsabadi et al., 2005, Huang et al., 2008) on  
31 the longitudinal stiffness and strength of the structure. These studies have provided the design  
32 community with accurate and practical models (e.g., Section 7 of the Caltrans Seismic Design  
33 Criteria) which consider complex end effects and substantially define the dynamic properties of  
34 the structure. The focus of this paper is on the influence of bridge end details on the lateral, or  
35 transverse, structural properties, which are governed by markedly different mechanisms as  
36 compared to the longitudinal behavior. The most apparent difference is the frequent lack of the  
37 soil resistance in the transverse direction and the reinforcing details of the abutment shear key,  
38 both of which contribute to substantially different stiffness and strength values.

39  
40 Unlike the models developed for the longitudinal response of bridge end conditions, the Caltrans  
41 Seismic Design Criteria recommends simplified assumptions for the transverse abutment  
42 stiffnesses which have evolved through convenience and intuition, rather than the physical  
43 governing behavior. The current procedure utilizes a linear, elastic spring with half the stiffness  
44 of the adjacent bridge bent. The intent of this approach is to provide a suitable end boundary  
45 condition to suppress spurious (lateral twisting) modes of vibration that would result if the  
46 pinning effects of the abutment shear keys were neglected. However, considering the

47 significance of the overall stiffness in the dynamic response of a structure and the resulting force  
48 and deformation distribution for each component, it is questionable whether this assumption  
49 should be an acceptable practice. While the current design methodology may be suitable for  
50 ordinary configurations, research has not verified the appropriateness of transverse stiffness  
51 recommendations made in the SDC. Moreover, the shear keys are viewed more as a brittle fuse  
52 during the seismic response of the structure, rather than a ductile, energy dissipating element.  
53 Thus, not only is there a need to investigate the stiffness and strength of shear keys, but there is  
54 also an opportunity to develop an energy dissipating element from the shear key response. The  
55 latter requires examining the nonlinear response of these elements designed with modern  
56 practices while also developing innovative reinforcement details to improve the ductility of the  
57 shear keys, but is not the focus of this paper.

58  
59 Two models are investigated herein that describe the transverse response of the abutment shear  
60 key. The first model is a linear elastic spring with half the stiffness of the closest bent as  
61 specified by current design provisions. For comparison, a nonlinear spring is developed and  
62 employed which considers deck to shear key gap effects, an ultimate strength capacity, and  
63 inelastic deformation capacity. The elastic stiffness for the nonlinear spring is calculated with a  
64 two dimensional continuum model of a typical shear key cross-section while the ultimate  
65 strength is calculated by using code specified shear friction equations. Seven bridge  
66 configurations are selected to compare the effect of each model across a wide-range of  
67 parameters. A suite of ground motions is used to conduct dynamic analyses on each of the seven  
68 models using both the linear and nonlinear shear key model with varying strength capacities.

69 Key findings from the analyses are discussed with implications to the application of each model  
70 in the design of bridges.

71  
72 The paper begins by introducing the motivation for the current study, including common  
73 geometries and loading on bridge abutment components. Next, the analytical modeling approach  
74 is presented along with the bridge archetype structures and associated ground motions for the  
75 dynamic analyses. Finally, the results are discussed in the context of current code-based  
76 modeling assumptions.

## 78 **BACKGROUND AND MOTIVATION**

79 Abutment shear keys, shown schematically in Figure 1, are typically designed as brittle elements,  
80 with the assumption that they will lose strength capacity during a large seismic event if the  
81 abutment is supported on piles, thus serving as a fuse that protects the piling. In the case of  
82 spread footing conditions, the keys are still considered brittle elements, albeit with a larger  
83 strength capacity so as to ensure they remain intact. For detailed information on the design  
84 procedures, the reader is referred to the current edition of the Caltrans Seismic Design Criteria  
85 which provides a complete set of guidelines for post-tensioned reinforced concrete bridges.

86  
87 As an overview of the current seismic design procedure, the lateral earthquake design loads are  
88 dependent on an elastic acceleration demand (e.g., acceleration response spectrum curves found  
89 in Appendix B of the SDC). The acceleration demands are period dependent such that for  
90 periods larger than 0.2-0.4 seconds, spectral accelerations commonly decrease as the period  
91 increases. In considering the elastic stiffness of a typical bridge system, a large degree of

92 uncertainty is associated with the abutment shear key behavior in the case of moderate to severe  
93 earthquake events. While the stiffness of the bridge bent and abutment stiffness in the  
94 longitudinal (normal) direction are considered less variable due to a large amount of research  
95 conducted on the subassembly (Aschheim et al., 1997, Lehman and Moehle, 1998, Lehman, and  
96 Moehle, 2004, Romstad et al., 1995, Goel and Chopra, 1997, Shamsabadi et al., 2005, Huang et  
97 al., 2008), the lateral (transverse) behavior of abutments have not been rigorously investigated.  
98 Thus, the current seismic design criterion assumes that the lateral abutment stiffness is 50% as  
99 stiff as the nearest bents (section 7.8.2 in the SDC). This assumption is driven by the fact that  
100 end conditions (typically a shear key) will soften considerably at the Maximum Considered  
101 Earthquake (MCE) level, while providing significant elastic rigidity during low and moderate  
102 level seismic events.

103  
104 This assumption for the lateral abutment stiffness was introduced primarily as an analysis  
105 simplification, rather than basing the stiffness on the physical size and reinforcing details of the  
106 shear-key. The intent is to allow minimal transverse deformation at the abutments while  
107 suppressing spurious modes of vibration from an unsupported transverse end condition.  
108 Previously, informal design procedures included a two-part analysis with pinned and free  
109 boundary conditions, respectively, to capture the extreme conditions of the transverse end  
110 conditions. The bridge components would then be designed for the worst case of the two  
111 analysis results.

112  
113 With these observations, there is a need to investigate the appropriate model for transverse  
114 abutment response for use in analysis and design. The current assumption based on the adjacent

115 bent and bent stiffness warrants study and validation through comparison of a more realistic  
116 model of the expected behavior at the abutment. If invalid, an advancement of bridge design  
117 methodologies would be to incorporate a lateral stiffness model into the seismic design criterion  
118 for abutments, similar in form to the longitudinal model proposed by Romstad et al., (1995).  
119 Regardless of the accuracy of current seismic provisions, a nonlinear model of transverse shear  
120 key behavior would be valuable within a Performance Based Earthquake Engineering (PBEE,  
121 Deierlein et al., 2003) framework where accurate estimates of Engineering Demand Parameters  
122 (EDPs) such as inelastic deformation are a necessity.

123

#### 124 **PARAMETRIC STUDY OF BRIDGE GEOMETRIES AND SHEAR KEY STRENGTHS**

125 Post-tensioned box girder bridges can be adapted to meet a wide variety of physical constraints.  
126 Thus, it is difficult to capture the wide-spectrum of behavior with the parametric study presented  
127 in this paper. Rather, the current investigation is meant to query key geometrical features that,  
128 when coupled with the boundary conditions at the abutments, may influence the overall response  
129 of the structure.

130

131 A 3-span bridge described in Table 1 (geometry A) and illustrated in Figures 2 and 3 was  
132 designed for a high seismic risk site in Riverside, California. For simplicity, the structure is  
133 considered to be on a horizontal and vertical tangent. Furthermore, the bridge is relatively short,  
134 such that modifications to the abutment boundary conditions are expected to have the greatest  
135 effect on the overall structural response. The substructure consists of two bents, each with two  
136 1.2 m circular columns with cross-sectional properties shown in Figure 3a. The bridge deck is  
137 designed as a 1.6 m deep post-tensioned box girder illustrated in Figure 3b. The bent and deck

138 details remain constant across each of the geometries described below. The longitudinal  
139 abutment springs assume an abutment backwall depth of 1.6 m, a width of 11.0 m, and a  
140 movement rating of 50 mm.

141  
142 Six dissimilar bridge configurations (B, C, D, E, F and G) listed in Table 1 were included in the  
143 study, each representing a change to a key geometric feature or modeling parameter which may  
144 affect structural response. Configuration B modifies configuration A by rotating the bridge deck  
145 at a large (45 degree) skew to the bents and abutments. The effect of a large skew angle is  
146 expected to generate transverse loading at the abutments due to increased longitudinal inertia  
147 forces, and vice versa, resulting in higher mode effects. Configuration C is similar to  
148 configuration A with the exception of decreased end span lengths to 16.8 m. Such  
149 configurations, while not standard, are by no means uncommon and may change the dynamic  
150 response of the system. To study the effect of large deformations on shear-key response,  
151 configuration D provides an exceedingly flexible structure, relative to the original geometry of  
152 A, by doubling the length of each column. While configuration D may be very flexible  
153 compared to most bridges, the geometry was included to investigate the case of large period  
154 structures. Configuration E is identical to configuration A, except the bridge columns are  
155 assigned a fixed-fixed boundary condition, generating a lower period of vibration in the  
156 transverse direction. This is in contrast to bridges A-D which are pinned-fixed. While not  
157 provided herein, a strength check was done to ensure the increased shear demand resulting from  
158 the fixed-fixed condition remained less than the nominal capacity of the column. Finally,  
159 configurations F and G are identical to configuration A, except that the bent foundation soils are  
160 assumed to be compliant and are modeled with transverse and longitudinal springs.

161 Configuration F represents a relatively flexible soil-structure interaction, and configuration G  
162 represents a relatively stiff soil-structure interaction.

163

164 In addition to studying the effect of superstructure and substructure geometries, the ultimate  
165 strength of the shear-key was also included as a parameter. While the gap distance is relatively  
166 constant for a majority of bridges due to code provisions and practice, the shear key strength  
167 tends to be more variable, as it is driven by the magnitude of the resisting friction force from the  
168 steel reinforcing cage specified by the designer. An ultimate strength of 1054 kN is used as an  
169 upper-bound strength value along with 527 kN for the lower-bound. The larger capacity is  
170 calculated in the following section by assuming a shear-friction failure mode across a  
171 construction joint, while the latter is taken as half the original strength to investigate the  
172 sensitivity to this parameter. For most practical shear key geometries, the elastic stiffness of the  
173 key is quite large, so this parameter was not investigated in the parametric study.

174

## 175 **ANALYTICAL MODEL DEVELOPMENT**

### 176 *DYNAMIC MODEL*

177 The bridge geometries were modeled using a refined mesh of one-dimensional elements as  
178 shown in Figure 4. To isolate the effect of the shear-key model on the structural response, linear  
179 elastic frame and spring elements were used for the bridge superstructure and columns and  
180 abutment springs, respectively. The spring elements at the abutment are consistent with the  
181 requirements of the SDC Section 7.8.1, “*Longitudinal Abutment Response*”. The shear key  
182 elements were modeled with springs orthogonal to the longitudinal abutment spring and assigned  
183 properties consistent with the requirement of the SDC, Section 7.8.2, “*Transverse Abutment*”



184 *Response*” (i.e., half the stiffness of the adjacent bent), or the non-linear model described in the  
185 following section. The effects of compliant soils at foundations were considered for bridge  
186 configurations E and F. For other bridge configurations, the foundation supports at the bents  
187 were assumed to be rigid. Torsional restraint was not provided at the bridge abutments.  
188 Additional model parameters, such as superstructure and substructure section and material  
189 properties, were set in compliance with all applicable SDC recommendations and requirements  
190 and are summarized in Table 1.

191  
192 In common design practice, linear bridge analyses for seismic loading conditions are performed  
193 through a modal superposition approach such that the elastic mode shapes and participation  
194 factors amplify the modal deformation response from a site specific acceleration spectrum.  
195 While efficient and suitable to quantify maximum force and deformation demands on the  
196 structure, modal superposition is restricted to linear behavior and neglects record-to-record  
197 variability. Thus, for both the linear and non-linear shear-key model, seismic effects are  
198 assessed through dynamic time history analyses such that the analytic model is solved at each  
199 time step employing the (unconditionally stable) Newmark constant average acceleration time  
200 integration technique.

201  
202 While the mass and stiffness matrices are accurately calculated from known material parameters  
203 and bridge geometries, the formulation of the damping matrix is somewhat more intangible. For  
204 this study, the damping matrix is constructed directly through a mass-proportional approach such  
205 that a 5% of critical damping ratio is achieved at the first mode of vibration.

206

207 *CONSTITUTIVE MODELS*

208 Standard constitutive models, consistent with the current edition of the Caltrans SDC, are used  
209 such that gross cross-section properties are assumed for the post-tensioned superstructure and  
210 cracked section properties are assumed for the substructure column bents. The modulus of  
211 elasticity for all concrete elements is calculated using the concrete compressive strength  
212 according to  $E_c = 57,000 \sqrt{f'_c}$ .

213  
214 For the non-linear shear-key model, a rate-independent force-deformation model is assumed for  
215 each of the two shear keys at each abutment shown in Figure 4. The formulation of the model  
216 illustrated in Figure 5 includes an initial gap distance of 25 mm between the bridge  
217 superstructure and the shear key, followed by a linear-elastic response and a perfectly plastic  
218 region to represent the post failure behavior of the key. While the gap distance will change as  
219 the shear key fuses and deforms plastically, the ultimate shear key force and shear key stiffness  
220 are assumed to remain unchanged throughout the analysis.

221  
222 The shear key strength capacity,  $F_{key}$ , is determined from the shear friction method ( $F_{key} =$   
223  $\mu A_s F_y$ ), where  $A_s$  is the cross sectional area of the reinforcing steel in the shear key failure plane,  
224  $\mu$  is the static coefficient of friction, and  $F_y$  is the yield strength of steel (414 MPa). The value of  
225  $\mu$  depends on the construction details, where monolithic construction will provide a larger  
226 friction coefficient as compared to a cross-section with construction joints. For this work,  $\mu$  is  
227 taken to be 1.0. Figure 6a illustrates the cross-section of the shear key, where  $A_s = 2550 \text{ mm}^2$ ,  
228 producing a capacity of 1054 kN. Adjusting the coefficient of friction to 0.5 - a conservative  
229 value for a concrete to concrete interface with construction joints - yields a shear key strength of

230 527 kN. Both strength values (1054 and 527 kN) will be used in the parametric study to  
231 investigate the influence of strength on the overall bridge performance.

232

233 The stiffness of the shear key for the nonlinear model is calculated with a plane stress, two-  
234 dimensional continuum model illustrated in Figure 6b. The material properties are assumed  
235 isotropic with a homogenous elastic modulus equal to 28,600 MPa. Referring to Figure 6b, the  
236 key is fixed along the bottom surface and loaded in the lateral direction with a pressure load  
237 distributed over the approximate height of the superstructure. The nodal reactions at the base,  
238 divided by the average deformation over the height of the superstructure generates a stiffness of  
239 18,900 kN/mm. Relative to the stiffness of the bents, this large value creates the effect of having  
240 a pinned end condition once the transverse gap has closed.

241

#### 242 *Soil-Structure Interaction*

243 Soil springs are used to model compliant foundation soils for bridge configurations F and G.  
244 Lateral soil springs at bent foundations are typically estimated by examining the lateral  
245 stiffnesses of the various soil layers at the bridge site and analyzing the interaction between the  
246 structural pile and the surrounding soil. In particular, the p-y method, as adopted by the U.S.  
247 Department of Transportation in 1984 and subsequently by most of the State Highway  
248 Departments, is applied for this work with the use of a popular commercial software package.  
249 The method is based on the work by Matlock (1970), Reese (1975), Welch and Reese (1972),  
250 and Nyman (1980).

251

252 For this work, two separate foundations were considered to envelope the response due to flexible  
253 and stiff foundation-to-soil conditions. Each column in Configuration F is assumed to be  
254 supported by twelve 1.2m-long, steel HP310x79 (HP12x53) piles with an axial service capacity  
255 of 41 metric tons. The pile cap is assumed to be free, while the soil is assumed to be layered  
256 gravel, sand and silt. The configuration yields a lateral pile stiffness of approximately 1.75  
257 kN/mm. Pile group effects are neglected, and the total lateral stiffness of each column footing is  
258 assumed to be 21 kN/mm. Alternatively, the lateral stiffness of each column footing for  
259 configuration G is obtained by assuming the substructure is constructed with cast-in-place drilled  
260 piles to represent a stiffer foundation condition. Each column in Configuration G is assumed to  
261 be supported by twelve cast-in-drilled-hole 610 mm diameter concrete piles with an axial service  
262 capacity of 64 metric tons). The pile cap is assumed to be fixed against rotation, while the soil is  
263 layered silty sand and sandy clay. The configuration yields a lateral pile stiffness of  
264 approximately 14 kN/mm. Pile group effects are neglected, and the total lateral stiffness of each  
265 column footing is assumed to be 168 kN/mm.

266  
267 To model the effect of compliant soil, a linear-elastic spring was placed in the longitudinal and  
268 transverse direction at the base of each column.

#### 269 270 *GROUND MOTION SELECTION*

271 The ground motions used for the time history analyses are adapted from a database of broad-  
272 band ground motions produced for the Pacific Earthquake Engineer Research (PEER) Center  
273 Transportation Research Program (TRP). For the TRP study, 40 pairs of orthogonal motions  
274 were chosen for relatively generic bridge structures, and sites with  $M = 7$ ,  $R = 10$  km and soil-

275 type with an average shear wave velocity of 250 m/s in the upper 30 m soil strata (Jayaram and  
276 Baker, 2010). To characterize the expected seismic demands at the site, the ground motions are  
277 scaled to the Maximum Considered Earthquake (MCE) level using the 5%-damped spectral  
278 acceleration for each structure at the transverse period of vibration or first mode if a pure  
279 transverse mode was not applicable (Vamvatsikos and Cornell, 2002). While this type of scaling  
280 has been shown to create somewhat biased analysis results (Luco and Bazzurro, 2007 and Baker,  
281 2011), for the purposes of this comparative work on the shear-key influence, the ground motion  
282 scaling is not rigorously considered.

283  
284 Figure 7c and 7d illustrates the acceleration response spectra for the scaled Fault Parallel (FP)  
285 motions for the transverse mode period of vibration of structures E and A, respectively. The  
286 darker line on each figure corresponds to the site-specific acceleration demands while the dashed  
287 line represents the mean of the scaled ground motions. An eigenvalue analysis demonstrated  
288 that, for structures A, C and E, the first and second modes correspond to the longitudinal and  
289 transverse mode of deformation, respectively. Due to the skewed geometry of Bridge B, the first  
290 mode ( $T = 1.42$  seconds) was a mixed longitudinal-transverse mode. For structure D (long  
291 column), the first mode shape represents a torsional motion while the transverse deformation is  
292 represented at a higher mode.

293

## 294 **RESULTS AND DISCUSSION**

295 The twenty-one bridge models, consisting of seven geometrical and constitutive variations with  
296 two shear key strength values for the nonlinear transverse shear key model, and the standard  
297 linear elastic representation, were analyzed for 40 pairs of ground motions. Thus, for each of the

298 seven bridge configurations, results from 80 ground motions applied to the linear elastic model  
299 are compared to results from nonlinear models with the same ground motion loading of varying  
300 shear-key strength capacities. For the purposes of this study, the maximum combined  
301 deformation in the lateral and longitudinal directions of each bent is reported. To compare a  
302 single quantity across each structure, the deformations are combined with the square-root-sum-  
303 square (SRSS) rule, where, typically, the lateral direction controls the magnitude of the SRSS  
304 deformation.

305  
306 The results from the comparative analyses are shown in Tables 2 and 3, and Figures 8 and 9.  
307 Referring to the table, the geometric mean, coefficient of variations (COV), and median  
308 maximum combined column deformations are listed in the table for each of the seven bridge  
309 configurations and the three shear key representations (one linear and two non-linear). The  
310 deformations from the two nonlinear shear key models are normalized by the linear elastic  
311 deformation for each ground motion. Figures 8a-d plot the ratio of the maximum deformation  
312 from the nonlinear shear key models to the maximum deformation from the linear model for both  
313 shear key strengths as a function of the spectral acceleration at the scaled mode of vibration for  
314 each of the 80 ground motions. In general, the results in Figure 8 illustrate the unscaled ground  
315 motion intensity ( $S_a(T, 5\%)$ ) has little effect on the comparison between the linear and nonlinear  
316 deformations. Figure 9 demonstrates the influence of soil-structure interaction on the  
317 comparison between models. Note, the ground motions correspond to the Fault Normal and  
318 Fault Parallel direction as presented in Jayaram and Baker (2010).

319

320 *EFFECT OF ULTIMATE SHEAR KEY STRENGTH*

321 Table 2 and Figure 8 demonstrate that the shear key strength has little effect on the median  
322 deformation demands across bridge geometries A, B, C, and E and a marginal effect for  
323 geometry D. For example, the median deformations for bridge A with a key strength of 1054 kN  
324 and 527 kN are 10.6 cm and 11.7 cm (equivalent drift of approximately 0.015 radians),  
325 respectively. Owing to the ductility demands of a weaker nonlinear shear key model, the models  
326 with a stronger key showed a smaller variation across the 80 ground motions.

327

### 328 *EFFECT OF BRIDGE GEOMETRY*

329 In general, the analysis results of the seven bridge configurations suggest that the current elastic  
330 shear key model predicts larger and more conservative deformations as compared to the use of a  
331 nonlinear representation of the key. The largest discrepancy between the results from the linear  
332 and nonlinear shear key models occurs for the archetype bridge structure, A. Referring to Table  
333 2, the median maximum deformations recorded from the linear analyses are approximately 0.73  
334 and 0.79 times smaller than the deformations for the nonlinear model with nearly pinned end  
335 conditions. Furthermore, Figure 8 demonstrates the significant dispersion of maximum  
336 deformations for both shear key strengths across the 80 ground motions for structures A and C-  
337 G. Structure B (skewed geometry), had the least scatter with a coefficient of variation of 0.09  
338 and 0.10 for the two key strengths.

339

340 The least conservative results were generated by the analysis of the long column bridge (D)  
341 where the median maximum deformations recorded from the nonlinear analyses with nearly  
342 pinned end conditions are approximately 0.96 and 1.02 times the deformations for the linear  
343 model. However, referring to Figure 8d, structure D also had the largest standard deviation of

344 the five analyses. Most likely, this result is due to the flexibility of the structure and the torsional  
345 nature of the fundamental mode of vibration. When comparing results through the square root of  
346 the sum squares of the transverse and lateral deformations, a more torsional mode of deformation  
347 may produce varying results across the 80 ground motions. Thus, the accuracy of the linear  
348 shear key model with respect to the nonlinear model for structure D may be more out of  
349 coincidence, rather than a truth from the study.

350

351 The analyses from structure E demonstrate that the linear model is most accurate for stiff, regular  
352 bridge geometries due to the effect of column stiffness on the transverse key stiffness in the  
353 linear model used in current California provisions (i.e.,  $0.5 \cdot k$ ). An increase in bent stiffness  
354 generates a stiffer model for the key and approaches the true stiffness represented by the  
355 nonlinear model. From Table 2, the ratios between the analysis results are 0.93 and 0.96 for the  
356 different key strengths with coefficients of variation of 19 and 24%, respectively.

357

#### 358 *EFFECT OF LINEAR AND NONLINEAR SHEAR KEY MODEL*

359 For configurations A, B, and C, the maximum deformations from the linear analyses are  
360 conservatively larger than the deformations from the nonlinear model, with the ratio  
361  $\Delta_{nonlinear}/\Delta_{linear}$  ranging from 0.73 to 0.86 across the two strength values. As discussed  
362 previously, the comparison of models on structure D (long column) appears to be accurate, but  
363 with a larger dispersion. The least scatter was recorded from the analysis results on bridge  
364 configuration B with the larger skew angle. A stiff, short period structure with regular geometry  
365 (configuration E), appears to be the most applicable use of the current provisions. The nonlinear



366 shear key models consistently produce smaller deformations as compared to the linear model due  
367 to the pinning effect of the large stiffness calculated from the finite element model (Figure 6).

368

369 *EFFECT OF SOIL SPRINGS AT BENTS*

370 For configurations F and G, and referring to Table 1, the soil springs at the bottom of the  
371 columns produce a structure with longer natural periods and associated deformations. Table 3  
372 lists the results for configurations F and G with a compliant soil model and should be compared  
373 to configuration A in Table 2. For configuration F with relatively compliant soils, column  
374 deformations are 6% larger when compared to a configuration with a rigid base (configuration  
375 A). For configuration G with a stiff soil model, the results are approximately equal to those  
376 listed in Table 2 for configuration A. In both cases, the use of soil springs at the bases of the  
377 columns does not appear to have a significant effect on the comparison between the results  
378 obtained from the dissimilar modeling approaches of the shear key.

379

380 **SUMMARY**

381 While several investigations have examined the longitudinal stiffness of bridge abutments there  
382 has not been a rigorous study on the lateral abutment stiffness and the effect on structural  
383 behavior during earthquake loading. Goel and Chopra (1997) reported field data from the  
384 instrumented US 101/Painter Street Overpass and partly investigated this stiffness; however,  
385 only two ground motions are discussed and only one produced significant inelastic response.

386

387 Perhaps due to the erstwhile lack of an analytical study, the current modeling assumptions for the  
388 transverse behavior of shear key elements in California developed primarily from convenience

389 and assumed behavior. Assuming linear elastic behavior, the transverse abutment is represented  
390 with a spring boundary condition equal to half the stiffness of the adjacent bent. The likely  
391 reason for this is to reduce spurious modes of vibration, which may result from a free end  
392 condition, while accounting for the gap distance between the deck and shear key face.  
393 Furthermore, once the gap distance is closed, the stiffness of the transverse key is much larger  
394 than the assumed stiffness, so maximum deformations are likely to be conservatively large.

395  
396 This paper presented a comparative study of the linear elastic shear key model suggested by  
397 California seismic provisions to a nonlinear representation, including a gap distance and inelastic  
398 deformation capacity. Mean and median maximum deformations on the bridge columns are  
399 recorded from 80 time history analyses using earthquake ground motions scaled to the Maximum  
400 Considered Earthquake (MCE) level for a site in Riverside, California. To investigate the  
401 sensitivity of the shear key models, a parametric study is presented using seven bridge  
402 configurations and two ultimate strength values for the nonlinear shear key model.

403  
404 The results suggest that for relatively short and stiff bridges, the linear model is an accurate  
405 assumption and yields deformations which are marginally smaller than deformations recorded  
406 using a nonlinear model. Furthermore, considering the large stiffness value of the nonlinear  
407 shear key, a pinned assumption may be a suitable lateral boundary condition at the abutments for  
408 most bridge geometries. For more flexible, yet standard, bridge geometries ( $T > 1.0$  seconds),  
409 the results suggest the current modeling approach may be overly conservative. The large  
410 standard deviation associated with the analysis results from a structure with long columns  
411 indicates that the current modeling approach may be, on average, unconservative for bridges

412 with highly flexible substructures. Finally, while the nonlinear shear key model was developed  
413 in accordance with expected physical behavior, the true behavior of the shear key element may  
414 warrant future experimental work.

415

#### 416 NOMENCLATURE

- 417  $A_s$  - Area of steel reinforcement,  $\text{mm}^2$
- 418  $E_c$  - Elastic modulus of concrete, MPa
- 419  $F_y$  - Yield strength of steel, MPa
- 420  $M$  - Earthquake magnitude
- 421  $R$  - Source to site distance, km
- 422  $a$  - Nodal relative acceleration vector,  $\text{m/s}^2$
- 423  $a_g$  - Ground acceleration vector,  $\text{m/s}^2$
- 424  $c$  - Damping matrix, kg/s
- 425  $f_s(u)$  - Nonlinear spring force response, kN
- 426  $f'_c$  - Ultimate strength of concrete, MPa
- 427  $k$  - Stiffness matrix, kN/m
- 428  $m$  - Lumped nodal mass matrix, kg
- 429  $u$  - Nodal relative displacement vector, m
- 430  $v$  - Nodal relative velocity vector, m/s
- 431  $\Delta_{linear}$  - Maximum column deformation from linear shear-key model, cm
- 432  $\Delta_{nonlinear}$  - Maximum column deformation from nonlinear shear-key model, cm
- 433  $\mu$  - Static coefficient of friction

434

435 **ACKNOWLEDGEMENTS**

436 The authors appreciate the input and review of California Department of Transportation Office  
437 of Earthquake Engineering. The assistance of Dokken Engineering in providing the archetype  
438 bridge geometry (labeled as A in the paper) is also acknowledged.

439

440 **REFERENCES**

441 Aschheim, M.A., Moehle, J.P., Mahin, S.A. (1997). "Design and evaluation of reinforced  
442 concrete bridges for seismic resistance." Earthquake Engineering Research Center,  
443 University of California, Berkeley, 1997-03.

444 Baker, J.W. (2011). "Conditional Mean Spectrum: Tool for ground motion selection," Journal of  
445 Structural Engineering, ASCE, 137(3), 322-331.

446 Caltrans Seismic Design Criteria (SDC) Version 1.6, Caltrans. (2010).

447 Cornell, C.A. and Krawinkler, H. (2000). "Progress and Challenges in Seismic Performance  
448 Assessment," PEER Center News, 3(2).

449 Deierlein, G.G., Krawinkler, H. and Cornell, C.A. (2003). "A framework for performance-based  
450 earthquake engineering." Proceedings, 2003 Pacific Conference on Earthquake  
451 Engineering, Christchurch, New Zealand.

452 Goel, R.K. and Chopra, A.K. (1997). "Evaluation of bridge abutment capacity and stiffness  
453 during earthquakes." Earthquake Spectra, 13(1), 1-23.

454 Huang, J., Shield, C.K. and French, C.E. (2008). "Parametric study of concrete integral abutment  
455 bridges." Journal of Bridge Engineering, ASCE, 13(5), 511-526.

456 Jayaram, N., and Baker, J. W. (2010). "Ground-Motion Selection for PEER Transportation  
457 Research Program." Proceedings, 7th International Conference on Urban Earthquake

458 Engineering (7CUEE) & 5th International Conference on Earthquake Engineering  
459 (5ICEE), Tokyo, Japan.

460 Lehman, D.E., and Moehle, J.P. (1998). "Seismic performance of well confined concrete  
461 columns." Pacific Earthquake Engineering Research Center, Berkeley, CA. UCB/PEER  
462 1998/01.

463 Lehman, D.E., and Moehle, J.P. (2004). "Experimental Evaluation of the Seismic Performance  
464 of Reinforced Concrete Bridge Columns." Journal of Structural Engineering, ASCE,  
465 130(6), 869-879.

466 Luco, N. and Bazzurro, P. (2007). "Does amplitude scaling of ground motion records result in  
467 biased nonlinear structural drift responses?" Earthquake Engineering and Structural  
468 Dynamics, 36(13), 1813-1835.

469 Matlock, H.. (1970). "Correlations for Design of Laterally-Loaded Piles in Soft Clay." Paper No.  
470 OTC 1204, Proceedings, Second Annual Offshore Technology Conference, Houston,  
471 Texas, Vol. 1, 577-594.

472 Nyman, K. J., (1980). "Field Load Tests of Instrumented Drilled Shafts in Coral Limestone",  
473 Unpublished Masters Thesis, The University of Texas at Austin, May 1980.

474 Reese, L.C., Cox, W.R. and Koop, F.D. (1975). "Field Testing and Analysis of Laterally Loaded  
475 Piles in Stiff Clay." Paper No. OTC 2313, Proceedings, 7<sup>th</sup> Offshore Technology  
476 Conference, Houston, Texas, 1975.

477 Romstad, K., Kutter, B., Maroney, B., Vanderbilt, E., Griggs, M. and Chai, Y.H. (1995).  
478 "Experimental measurements of bridge abutment behavior." Report No. UCD-STR-95-1,  
479 Department of Civil and Environmental Engineering, University of California, Davis.

480 Shamsabadi, A., Ashour, M. and Norris, G. (2005). "Bridge abutment nonlinear force-  
481 displacement-capacity prediction for seismic design." Journal of Geotechnical and  
482 Geoenvironmental Engineering, ASCE, 131(2), 151-161.

483 Vamvatsikos, D. and Cornell, A.C. (2002). "Incremental dynamic analysis." Earthquake  
484 Engineering and Structural Dynamics, 31(3), 491-514.

485 Welch, R.C. and Reese, L.C. (1972). "Laterally Loaded Behavior of Drilled Shafts." Research  
486 Report No. 3-5-65-89, conducted for Texas Highway Department and U.S. Department  
487 of Transportation, Federal Highway Administration, Bureau of Public Roads, by Center  
488 for Highway Research, The University of Texas at Austin, May, 1972.

1 **TABLES**

2 Table 1 –Bridge properties

|                                           | <b>A</b>            | <b>B*</b>         | <b>C</b>          | <b>D</b>          | <b>E</b>          | <b>F</b>          | <b>G</b>          |
|-------------------------------------------|---------------------|-------------------|-------------------|-------------------|-------------------|-------------------|-------------------|
| <b>Periods of Vibration</b>               |                     |                   |                   |                   |                   |                   |                   |
| Mode 1 (sec)                              | 1.31                | 1.42 <sup>#</sup> | 1.22              | 1.44 <sup>#</sup> | 0.74              | 1.54              | 1.34              |
| Transverse (sec)                          | 1.05 <sup>#</sup>   | n/a               | 1.00 <sup>#</sup> | n/a               | 0.55 <sup>#</sup> | 1.26 <sup>#</sup> | 1.08 <sup>#</sup> |
| <b>SUPERSTRUCTURE</b>                     |                     |                   |                   |                   |                   |                   |                   |
| No. of Spans                              | 3                   |                   |                   |                   |                   |                   |                   |
| Length (m)                                | 97.5                |                   | 73.2              |                   | 97.5              |                   |                   |
| Superstructure depth (m)                  | 1.6                 |                   |                   |                   |                   |                   |                   |
| Span 1 Length (m)                         | 29.0                |                   | 16.8              |                   | 29.0              |                   |                   |
| Span 2 Length (m)                         | 39.6                |                   |                   |                   |                   |                   |                   |
| Span 3 Length (m)                         | 29.0                |                   | 16.8              |                   | 29.0              |                   |                   |
| Strong Axis I (m <sup>4</sup> )           | 93.0                |                   |                   |                   |                   |                   |                   |
| Weak Axis I (m <sup>4</sup> )             | 2.39                |                   |                   |                   |                   |                   |                   |
| Cross-Sectional Area (m <sup>2</sup> )    | 6.39                |                   |                   |                   |                   |                   |                   |
| Concrete Strength ( $f'_c$ , MPa)         | 27.6                |                   |                   |                   |                   |                   |                   |
| <b>SUBSTRUCTURE</b>                       |                     |                   |                   |                   |                   |                   |                   |
| Columns per Bent                          | 2                   |                   |                   |                   |                   |                   |                   |
| Column Diameter (m)                       | 1.2                 |                   |                   |                   |                   |                   |                   |
| Bent 2 Height (m)                         |                     | 6.1               |                   | 12.2              |                   | 6.1               |                   |
| Bent 3 Height (m)                         |                     | 9.1               |                   | 18.3              |                   | 9.1               |                   |
| Effective I (m <sup>4</sup> )             | 0.0414              |                   |                   |                   |                   |                   |                   |
| Cross-Sectional Area (m <sup>2</sup> )    | 1.16                |                   |                   |                   |                   |                   |                   |
| Concrete Strength ( $f'_c$ , MPa)         | 34.5                |                   |                   |                   |                   |                   |                   |
| Soil spring stiffness (kN/mm/pile)        | n/a (fixed support) |                   |                   |                   |                   | 1.75              | 14.0              |
| <b>SHEAR KEY</b>                          |                     |                   |                   |                   |                   |                   |                   |
| <i>Linear model</i>                       |                     |                   |                   |                   |                   |                   |                   |
| Transverse stiffness – Abutment 1 (kN/mm) | 15.4                |                   |                   | 1.92              | 61.6              | 15.4              |                   |
| Transverse stiffness – Abutment 4 (kN/mm) | 4.56                |                   |                   | 0.57              | 18.2              | 4.56              |                   |
| Longitudinal Abutment Stiffness (kN/mm)   | 2.36                |                   |                   |                   |                   |                   |                   |
| <i>Nonlinear model</i>                    |                     |                   |                   |                   |                   |                   |                   |
| Gap distance (mm)                         | 25                  |                   |                   |                   |                   |                   |                   |
| Key stiffness (kN/mm)                     | 18,900 kN/mm        |                   |                   |                   |                   |                   |                   |
| Ultimate strength (kN)                    | 1054 & 527          |                   |                   |                   |                   |                   |                   |

3 \*Pier and abutments skewed 45° to deck

4 <sup>#</sup>Period used to scale ground motions

5

6

7

8 Table 2 – Maximum combined (SRSS) column deformation (cm) and ratio of maximum deformation  
 9 from nonlinear and linear shear key analyses ( $\Delta_{\text{nonlinear}}/\Delta_{\text{linear}}$ ) for fixed-base bridges.

| Geometry | Shear-key Model                                    | Strength (kN) | Mean        | COV         | Median      |
|----------|----------------------------------------------------|---------------|-------------|-------------|-------------|
| A        | Nonlinear                                          | 1054          | 11.0        | 0.24        | 10.6        |
|          |                                                    | 527           | 12.2        | 0.31        | 11.7        |
|          | Linear                                             | --            | 15.6        | 0.31        | 15.2        |
|          | $\Delta_{\text{nonlinear}}/\Delta_{\text{linear}}$ | 1054          | <b>0.74</b> | <b>0.28</b> | <b>0.73</b> |
| 527      |                                                    | <b>0.81</b>   | <b>0.26</b> | <b>0.79</b> |             |
| B        | Nonlinear                                          | 1054          | 13.4        | 0.29        | 12.6        |
|          |                                                    | 527           | 13.9        | 0.31        | 13.1        |
|          | Linear                                             | --            | 16.2        | 0.31        | 15.0        |
|          | $\Delta_{\text{nonlinear}}/\Delta_{\text{linear}}$ | 1054          | <b>0.84</b> | <b>0.09</b> | <b>0.84</b> |
| 527      |                                                    | <b>0.87</b>   | <b>0.10</b> | <b>0.86</b> |             |
| C        | Nonlinear                                          | 1054          | 9.3         | 0.30        | 8.7         |
|          |                                                    | 527           | 9.7         | 0.34        | 9.0         |
|          | Linear                                             | --            | 12.5        | 0.28        | 11.9        |
|          | $\Delta_{\text{nonlinear}}/\Delta_{\text{linear}}$ | 1054          | <b>0.77</b> | <b>0.28</b> | <b>0.77</b> |
| 527      |                                                    | <b>0.80</b>   | <b>0.22</b> | <b>0.79</b> |             |
| D        | Nonlinear                                          | 1054          | 15.5        | 0.41        | 14.0        |
|          |                                                    | 527           | 18.3        | 0.58        | 14.8        |
|          | Linear                                             | --            | 14.9        | 0.26        | 14.8        |
|          | $\Delta_{\text{nonlinear}}/\Delta_{\text{linear}}$ | 1054          | <b>1.07</b> | <b>0.37</b> | <b>0.96</b> |
| 527      |                                                    | <b>1.22</b>   | <b>0.44</b> | <b>1.02</b> |             |
| E        | Nonlinear                                          | 1054          | 6.1         | 0.34        | 5.7         |
|          |                                                    | 527           | 6.6         | 0.35        | 6.5         |
|          | Linear                                             | --            | 7.0         | 0.42        | 6.1         |
|          | $\Delta_{\text{nonlinear}}/\Delta_{\text{linear}}$ | 1054          | <b>0.92</b> | <b>0.19</b> | <b>0.93</b> |
| 527      |                                                    | <b>0.99</b>   | <b>0.24</b> | <b>0.96</b> |             |

10  
 11  
 12  
 13  
 14  
 15  
 16  
 17



18 Table 3 – Maximum column deformation (cm) and ratio of maximum deformation from nonlinear and  
 19 linear shear key analyses ( $\Delta_{\text{nonlinear}}/\Delta_{\text{linear}}$ ) for flexible-base (deformable soil) structures.

| Geometry                                 | Shear-key Model                                    | Strength (kN) | Mean        | COV         | Median      |
|------------------------------------------|----------------------------------------------------|---------------|-------------|-------------|-------------|
| F<br>( $K_{\text{soil}} = 21$<br>kN/mm)  | Nonlinear                                          | 1054          | 11.8        | 0.28        | 11.2        |
|                                          |                                                    | 527           | 13.1        | 0.35        | 12.4        |
|                                          | Linear                                             | --            | 14.8        | 0.33        | 13.3        |
|                                          | $\Delta_{\text{nonlinear}}/\Delta_{\text{linear}}$ | 1054          | <b>0.84</b> | <b>0.25</b> | <b>0.86</b> |
| 527                                      |                                                    | <b>0.91</b>   | <b>0.23</b> | <b>0.90</b> |             |
| G<br>( $K_{\text{soil}} = 168$<br>kN/mm) | Nonlinear                                          | 1054          | 11.1        | 0.25        | 10.4        |
|                                          |                                                    | 527           | 12.4        | 0.30        | 11.8        |
|                                          | Linear                                             | --            | 15.4        | 0.31        | 14.9        |
|                                          | $\Delta_{\text{nonlinear}}/\Delta_{\text{linear}}$ | 1054          | <b>0.76</b> | <b>0.27</b> | <b>0.74</b> |
| 527                                      |                                                    | <b>0.84</b>   | <b>0.26</b> | <b>0.81</b> |             |

20

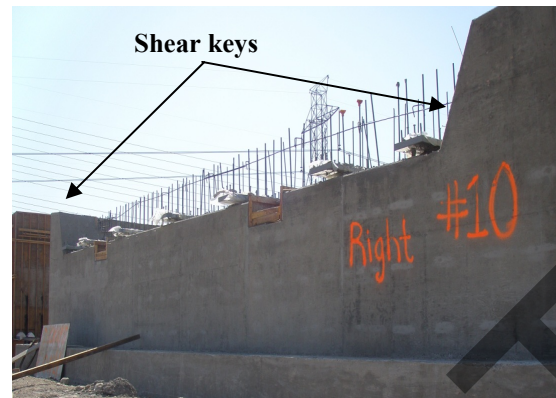

(a)

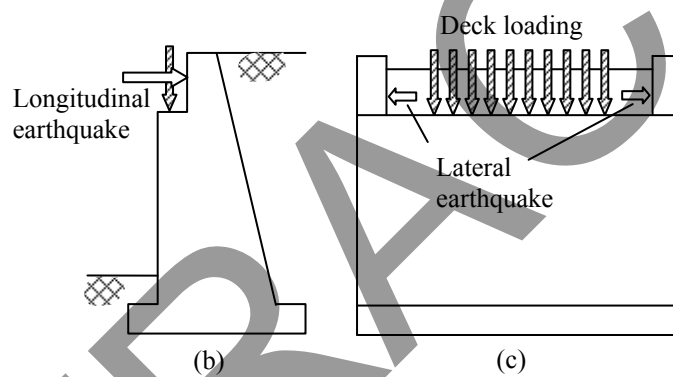

Figure 1 – (a) Abutment shear keys, (b) typical longitudinal and (c) lateral (transverse) abutment and shear key details and loading.

Figure 2

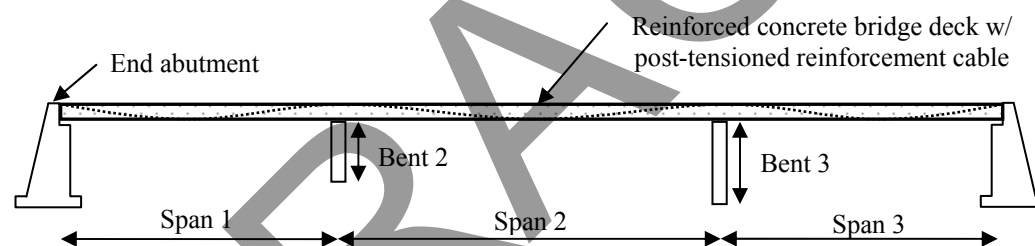

Figure 2 – Longitudinal elevation view of bridge geometry

Figure 3

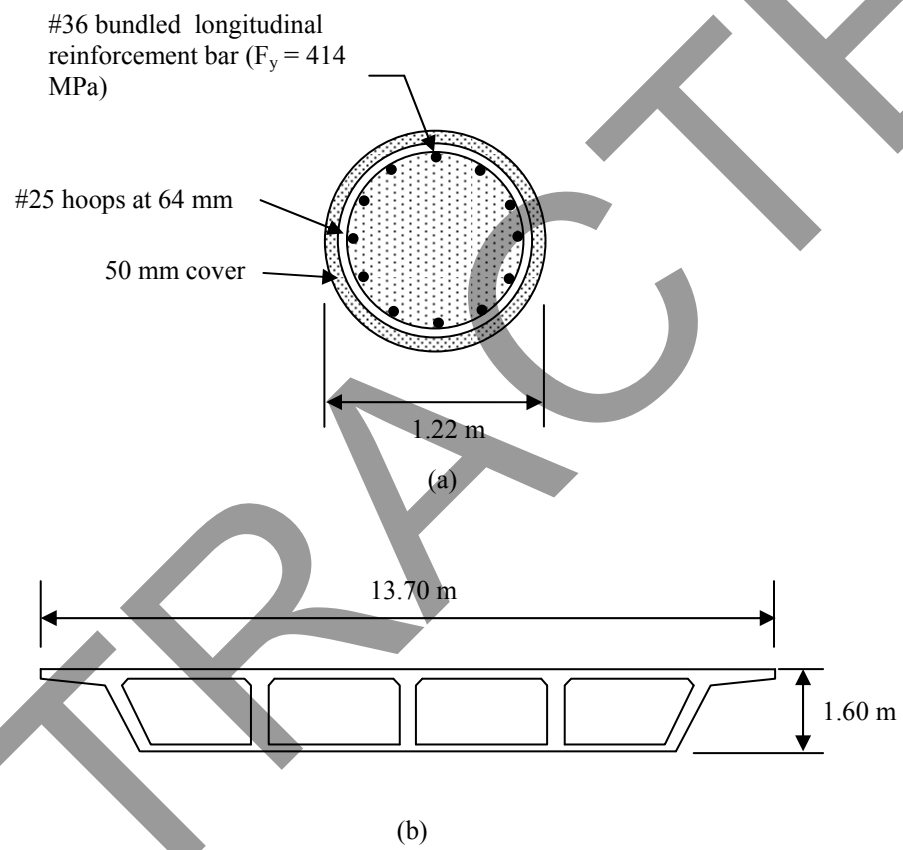

Figure 3 – (a) Typical column and (b) Bridge deck cross-sections.

Figure 4

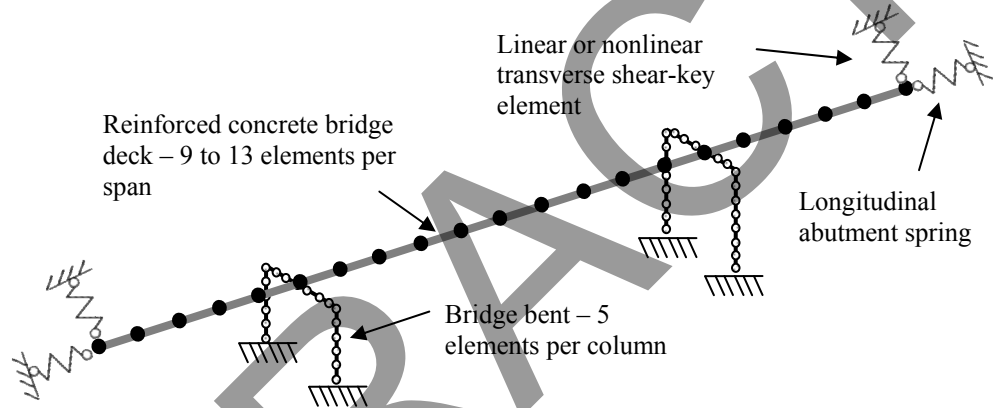

Figure 4 – Schematic analysis model and mesh for bridge geometry "A"

Figure 5

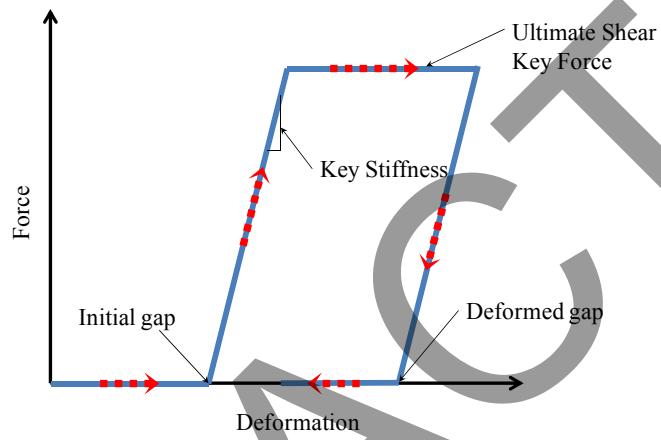

Figure 5 – Nonlinear shear key constitutive model

Figure 6

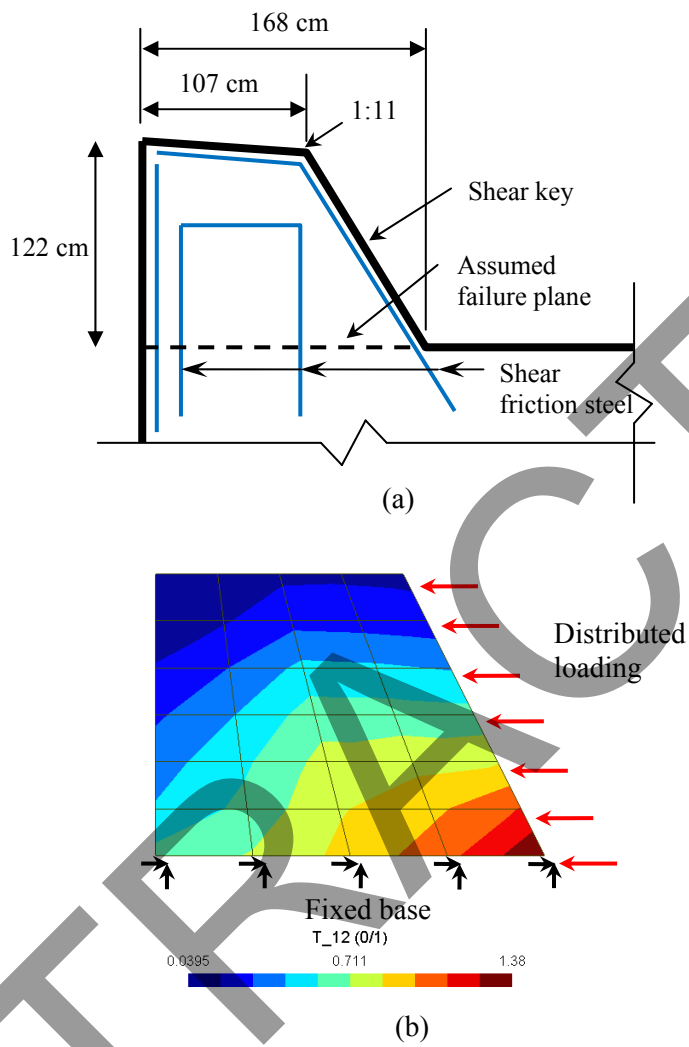

Figure 6 – (a) Detail/elevation and (b) Plane stress finite element model for abutment shear keys

Figure 7

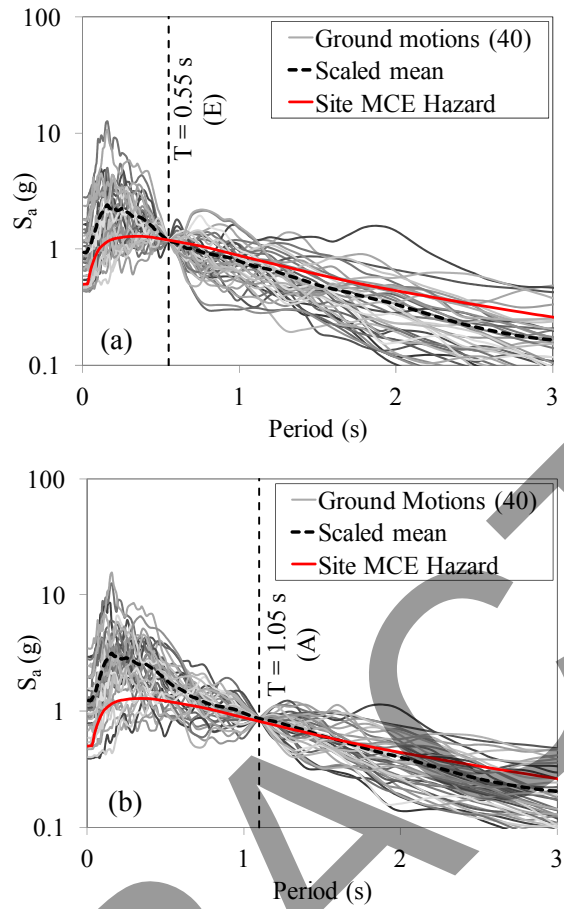

Figure 7 – Fault Parallel (FP) scaled ground motions at (a) 0.55 seconds for Bridge Structure E, and (b) 1.05 seconds for Bridge Structure A transverse mode periods.



Figure 8

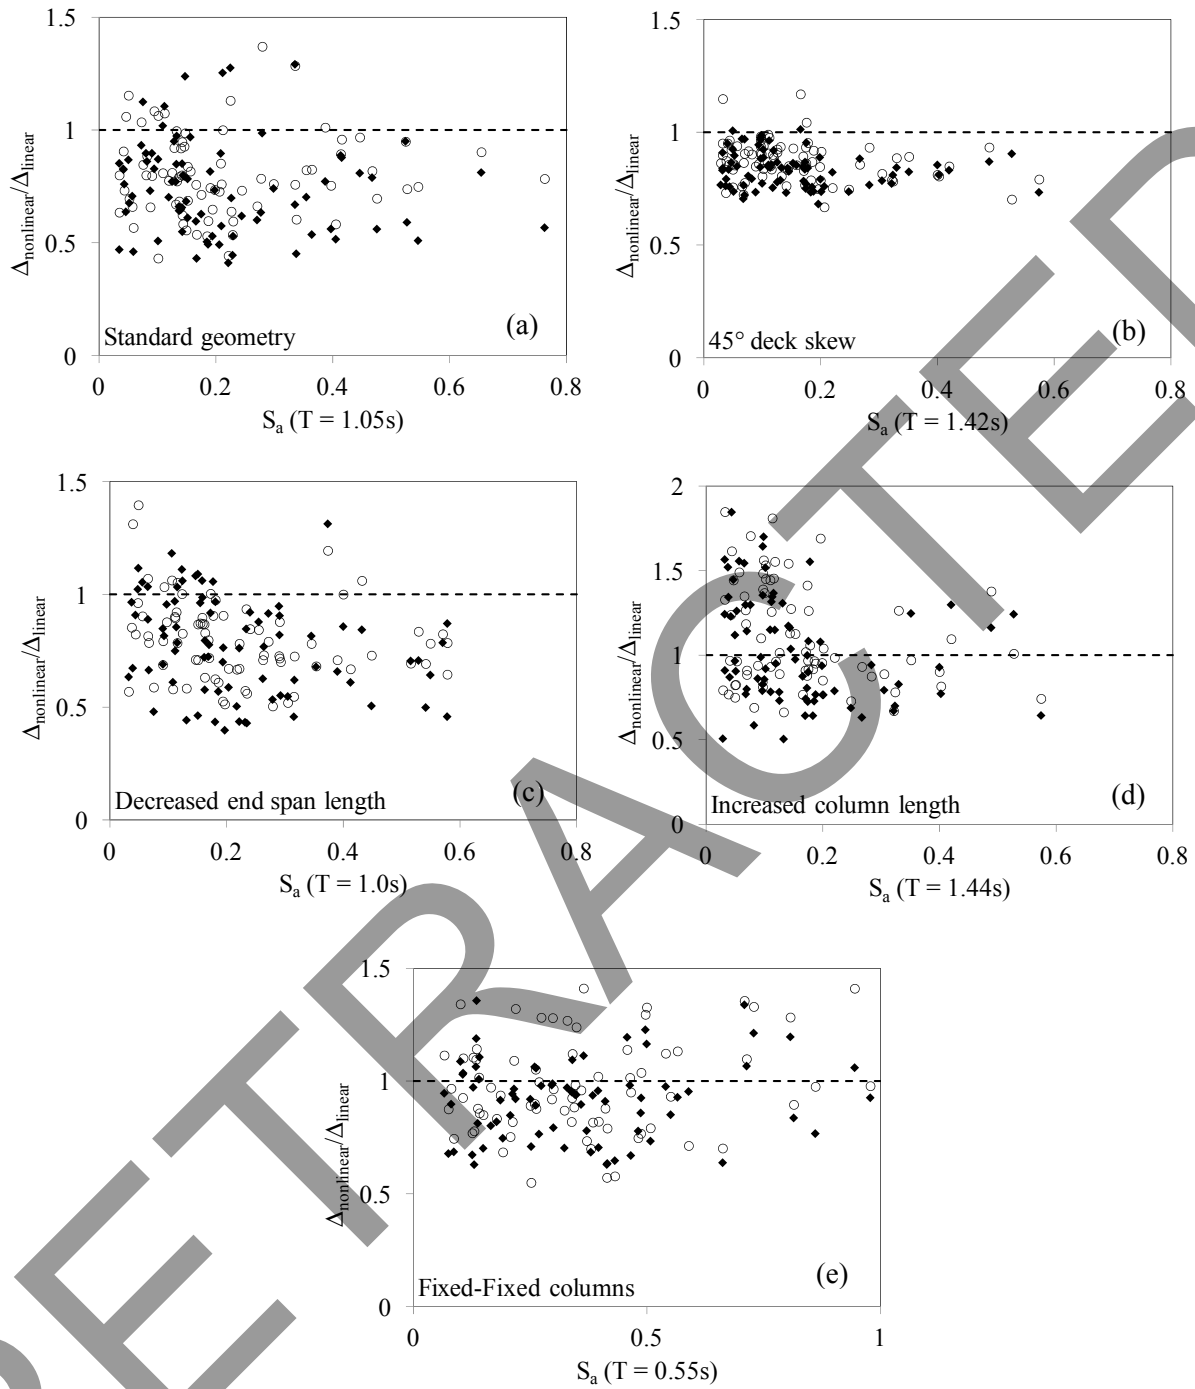

Figure 8 – Maximum column deformations from nonlinear shear-key model normalized by linear model deformations plotted versus the unscaled ground motion intensity for bridge configuration (a) A, (b) B, (c) C, (d) D, and (e) E (note the scale change). The plots also illustrate the effect of the two shear key strengths -- 1054 kN (♦) and 524 kN (o).

Figure 9

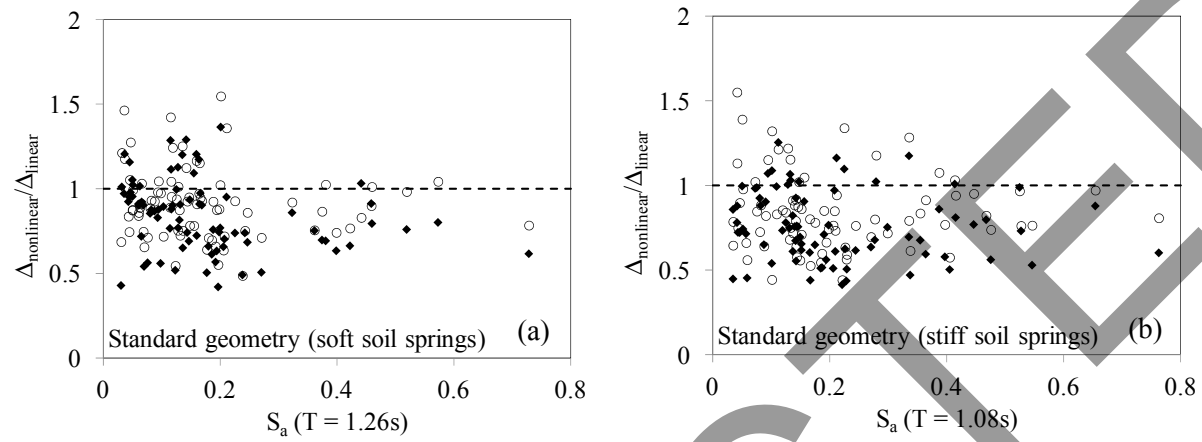

Figure 9 – Maximum column deformations from nonlinear shear-key model normalized by linear model deformations plotted versus the unscaled ground motion intensity for bridge configuration (a) F and (b) G with soil-structure interaction.

## TABLES AND FIGURES CAPTIONS

Table 1 – Bridge properties

Table 2 – Maximum combined (SRSS) column deformation (cm) and ratio of maximum deformation from nonlinear and linear shear key analyses ( $\Delta_{\text{nonlinear}}/\Delta_{\text{linear}}$ ) for fixed-base bridges.

Table 3 – Maximum column deformation (cm) and ratio of maximum deformation from nonlinear and linear shear key analyses ( $\Delta_{\text{nonlinear}}/\Delta_{\text{linear}}$ ) for flexible-base (deformable soil) structures.

Figure 1 – (a) Abutment shear keys, (b) typical longitudinal and (c) lateral (transverse) abutment and shear key details and loading.

Figure 2 – Longitudinal elevation view of bridge geometry.

Figure 3 – (a) Typical column and (b) Bridge deck cross-sections.

Figure 4 – Schematic analysis model and mesh for bridge geometry “A”

Figure 5 – Nonlinear shear key constitutive model

Figure 6 – (a) Detail/elevation and (b) Plane stress finite element model for abutment shear keys

Figure 7 – Fault Parallel (FP) scaled ground motions at (a) 0.55 seconds for Bridge Structure E, and (b) 1.05 seconds for Bridge Structure A transverse mode periods.

Figure 8 – Maximum column deformations from nonlinear shear-key model normalized by linear model deformations plotted versus the unscaled ground motion intensity for bridge configuration (a) A, (b) B, (c) C, (d) D (note the scale change), and (e) E. The plots also illustrate the effect of the two shear key strengths -- 1054 kN ( $\blacklozenge$ ) and 524 kN (o).

Figure 9 – Maximum column deformations from nonlinear shear-key model normalized by linear model deformations plotted versus the unscaled ground motion intensity for bridge configuration (a) F and (b) G with soil-structure interaction.
